# Supplementary material for: Histone Deacetylase 3 Depletion in Osteo/Chondroprogenitor Cells Decreases Bone Density and Increases Marrow Fat
Source: PubMed Central journal article supplement (PMC2901996; doi:10.1371/journal.pone.0011492), 2010-07-09
Supplement: pone.0011492.s006.pdf [file pone.0011492.s006.pdf]

|    | A         | B             | C             | D                       | E                       | F                       | G             | H             | I              |
|----|-----------|---------------|---------------|-------------------------|-------------------------|-------------------------|---------------|---------------|----------------|
| 1  | SYMBOL    | Mean(KO)_exp1 | Mean(WT)_exp1 | log2ratio(KOvs WT)_exp1 | p-value(WT vs. KO)_exp1 | Fold-Change(KO/WT)_exp1 | Mean(KO)_exp2 | Mean(WT)_exp2 | log2ratio_exp2 |
| 2  | Cdkn1a    | 11.774        | 10.0232       | 1.7508                  | 0.000488906             | 3.36548                 | 11.1188       | 9.36188       | 1.75692        |
| 3  | Ephx1     | 8.53408       | 7.10818       | 1.4259                  | 0.000456095             | 2.68681                 | 8.24687       | 6.72974       | 1.51713        |
| 4  | Plat      | 8.76877       | 7.89959       | 0.86918                 | 0.000480702             | 1.82662                 | 8.66719       | 7.54744       | 1.11975        |
| 5  | Icam1     | 9.7452        | 9.19917       | 0.54603                 | 0.00608673              | 1.46006                 | 9.99299       | 8.89155       | 1.10144        |
| 6  | AB023957  | 7.43848       | 6.61673       | 0.82175                 | 0.0310754               | 1.76754                 | 8.2552        | 7.16946       | 1.08574        |
| 7  | Phlda3    | 9.00871       | 8.06815       | 0.94056                 | 0.00239852              | 1.91928                 | 9.00543       | 7.91998       | 1.08545        |
| 8  | Nrp1      | 10.4152       | 9.67555       | 0.73965                 | 0.0140421               | 1.6698                  | 10.4223       | 9.45406       | 0.96824        |
| 9  | Tmem178   | 7.24804       | 6.25835       | 0.98969                 | 0.00564331              | 1.98577                 | 7.38597       | 6.43637       | 0.9496         |
| 10 | Gpnm3     | 7.51083       | 6.99276       | 0.51807                 | 0.0352094               | 1.43204                 | 7.42737       | 6.52208       | 0.90529        |
| 11 | Mmp2      | 13.8509       | 13.3854       | 0.4655                  | 0.0242932               | 1.38077                 | 13.7775       | 12.8727       | 0.9048         |
| 12 | Tnfrsf11b | 7.33113       | 6.97361       | 0.35752                 | 0.0133059               | 1.28123                 | 7.70677       | 6.84115       | 0.86562        |
| 13 | Gas6      | 10.622        | 10.0132       | 0.6088                  | 0.0189933               | 1.52499                 | 10.5818       | 9.77355       | 0.80825        |
| 14 | Slc19a2   | 7.58158       | 6.92847       | 0.65311                 | 0.00207923              | 1.57255                 | 7.99097       | 7.20408       | 0.78689        |
| 15 | Tmem43    | 10.1441       | 9.45083       | 0.69327                 | 0.000215618             | 1.617                   | 10.2433       | 9.46452       | 0.77878        |
| 16 | Anxa8     | 7.30089       | 6.64108       | 0.65981                 | 0.00043334              | 1.57988                 | 7.24455       | 6.48302       | 0.76153        |
| 17 | Slc29a3   | 10.6333       | 10.1215       | 0.5118                  | 0.00329876              | 1.4258                  | 10.8002       | 10.0416       | 0.7586         |
| 18 | Timp3     | 10.5251       | 9.95367       | 0.57143                 | 0.0267644               | 1.48595                 | 10.2025       | 9.44949       | 0.75301        |
| 19 | LOC100046 | 6.72183       | 6.02282       | 0.69901                 | 0.0228087               | 1.62338                 | 6.88789       | 6.14004       | 0.74785        |
| 20 | Slc16a9   | 8.9059        | 8.36263       | 0.54327                 | 0.0189925               | 1.45726                 | 9.17071       | 8.42739       | 0.74332        |
| 21 | Gstm6     | 7.55378       | 6.44888       | 1.1049                  | 0.00209928              | 2.15084                 | 6.90638       | 6.1653        | 0.74108        |
| 22 | Aaas      | 7.77148       | 7.12704       | 0.64444                 | 0.00026165              | 1.56313                 | 7.32957       | 6.60045       | 0.72912        |
| 23 | Tpm1      | 10.9346       | 10.6003       | 0.3343                  | 0.0174136               | 1.26079                 | 10.939        | 10.2118       | 0.7272         |
| 24 | Ahnak2    | 7.80684       | 7.17832       | 0.62852                 | 0.0223786               | 1.54598                 | 7.76862       | 7.04438       | 0.72424        |
| 25 | Exoc4     | 7.54025       | 7.10736       | 0.43289                 | 0.00785566              | 1.34994                 | 7.98939       | 7.26703       | 0.72236        |
| 26 | Lgr5      | 6.44579       | 5.90427       | 0.54152                 | 0.00506022              | 1.45551                 | 6.92361       | 6.20376       | 0.71985        |
| 27 | E430002G0 | 8.16314       | 7.41559       | 0.74755                 | 0.00342105              | 1.67894                 | 8.7768        | 8.07762       | 0.69918        |
| 28 | Prep      | 11.2492       | 10.7219       | 0.5273                  | 0.0498294               | 1.44118                 | 11.6809       | 11.003        | 0.6779         |
| 29 | Pall1     | 12.3025       | 11.924        | 0.3785                  | 0.00518872              | 1.30003                 | 12.4378       | 11.7625       | 0.6753         |
| 30 | LOC100047 | 9.81256       | 9.16506       | 0.6475                  | 0.014647                | 1.56645                 | 9.17456       | 8.50262       | 0.67194        |
| 31 | Bcl11b    | 8.93913       | 8.3965        | 0.54263                 | 0.00297636              | 1.45663                 | 9.41025       | 8.75379       | 0.65646        |
| 32 | Hmgcs2    | 7.11809       | 6.79347       | 0.32462                 | 0.0119446               | 1.25233                 | 7.57408       | 6.92062       | 0.65346        |
| 33 | Scd2      | 12.3986       | 11.8344       | 0.5642                  | 0.00628111              | 1.47859                 | 12.5899       | 11.9422       | 0.6477         |
| 34 | Polk      | 7.57054       | 7.21106       | 0.35948                 | 0.0311492               | 1.28297                 | 7.76825       | 7.14834       | 0.61991        |

|    | A          | B             | C             | D                       | E                       | F                       | G             | H             | I              |
|----|------------|---------------|---------------|-------------------------|-------------------------|-------------------------|---------------|---------------|----------------|
| 1  | SYMBOL     | Mean(KO)_exp1 | Mean(WT)_exp1 | log2ratio(KOvs WT)_exp1 | p-value(WT vs. KO)_exp1 | Fold-Change(KO/WT)_exp1 | Mean(KO)_exp2 | Mean(WT)_exp2 | log2ratio_exp2 |
| 35 | Lgals3bp   | 8.68509       | 8.19617       | 0.48892                 | 0.0172717               | 1.40339                 | 7.96954       | 7.35312       | 0.61642        |
| 36 | Angptl4    | 9.73073       | 9.02142       | 0.70931                 | 0.0386718               | 1.63502                 | 9.57485       | 8.97527       | 0.59958        |
| 37 | 6330406115 | 7.39563       | 6.66961       | 0.72602                 | 0.0366175               | 1.65407                 | 7.775         | 7.18118       | 0.59382        |
| 38 | Pax1       | 8.11415       | 7.28067       | 0.83348                 | 0.014363                | 1.78198                 | 7.9054        | 7.31275       | 0.59265        |
| 39 | Cxcl2      | 7.90026       | 7.31359       | 0.58667                 | 0.0191929               | 1.50178                 | 8.02404       | 7.43681       | 0.58723        |
| 40 | Ednra      | 10.7144       | 10.569        | 0.1454                  | 0.010835                | 1.106                   | 10.9192       | 10.3381       | 0.5811         |
| 41 | Sfrp4      | 8.05608       | 7.55131       | 0.50477                 | 0.0330263               | 1.4189                  | 8.44706       | 7.89222       | 0.55484        |
| 42 | Eef2       | 10.8943       | 10.7252       | 0.1691                  | 0.0150659               | 1.12438                 | 10.9488       | 10.4097       | 0.5391         |
| 43 | Atp1b1     | 9.29991       | 9.20399       | 0.09592                 | 0.00255164              | 1.06874                 | 9.67722       | 9.13975       | 0.53747        |
| 44 | Ror2       | 8.6428        | 8.09016       | 0.55264                 | 0.0360003               | 1.46677                 | 8.59683       | 8.06356       | 0.53327        |
| 45 | Thbs2      | 13.2907       | 13.0216       | 0.2691                  | 0.0100208               | 1.20508                 | 13.5055       | 12.9743       | 0.5312         |
| 46 | Rnf145     | 8.48214       | 8.10145       | 0.38069                 | 0.00105113              | 1.30197                 | 8.4124        | 7.8841        | 0.5283         |
| 47 | Igf1bp4    | 12.11         | 11.8002       | 0.3098                  | 0.00738228              | 1.23954                 | 12.3694       | 11.8423       | 0.5271         |
| 48 | Kcne4      | 8.56435       | 8.23175       | 0.3326                  | 0.0184764               | 1.25928                 | 8.36011       | 7.8499        | 0.51021        |
| 49 | Col5a1     | 13.8306       | 13.2831       | 0.5475                  | 0.0208599               | 1.4616                  | 13.6771       | 13.1737       | 0.5034         |
| 50 | B4gal1     | 9.05173       | 8.80937       | 0.24236                 | 0.0376083               | 1.18293                 | 9.01581       | 8.51511       | 0.5007         |
| 51 | Ccnd1      | 9.69774       | 9.09075       | 0.60699                 | 0.0154819               | 1.52308                 | 9.64448       | 9.14567       | 0.49881        |
| 52 | Fzd7       | 7.28962       | 7.11918       | 0.17044                 | 0.0227966               | 1.1254                  | 7.65494       | 7.15651       | 0.49843        |
| 53 | Axin2      | 6.42735       | 5.98069       | 0.44666                 | 0.0262626               | 1.36289                 | 6.61005       | 6.11875       | 0.4913         |
| 54 | Cd14       | 8.21723       | 7.48441       | 0.73282                 | 0.0411215               | 1.66188                 | 7.69608       | 7.21216       | 0.48392        |
| 55 | Plp1       | 6.47036       | 5.97652       | 0.49384                 | 0.0284665               | 1.40819                 | 6.848         | 6.36518       | 0.48282        |
| 56 | Emilin1    | 9.76253       | 9.36873       | 0.3938                  | 0.045256                | 1.31384                 | 9.82248       | 9.34086       | 0.48162        |
| 57 | Angptl2    | 9.05251       | 8.36652       | 0.68599                 | 0.0338137               | 1.60881                 | 8.56176       | 8.08045       | 0.48131        |
| 58 | Dpep1      | 7.63353       | 7.01547       | 0.61806                 | 0.019549                | 1.53482                 | 7.54122       | 7.06286       | 0.47836        |
| 59 | Cacna1g    | 7.63258       | 7.18273       | 0.44985                 | 0.0246323               | 1.3659                  | 8.05814       | 7.59331       | 0.46483        |
| 60 | Sgms2      | 9.81974       | 9.32823       | 0.49151                 | 0.0200425               | 1.40591                 | 9.17259       | 8.71004       | 0.46255        |
| 61 | Nfatc4     | 9.90726       | 9.73926       | 0.168                   | 0.0137744               | 1.1235                  | 10.1307       | 9.66997       | 0.46073        |
| 62 | Mapkapk3   | 6.88574       | 6.35563       | 0.53011                 | 0.0119302               | 1.44404                 | 6.8009        | 6.34021       | 0.46069        |
| 63 | Lmna       | 11.6745       | 11.2313       | 0.4432                  | 0.00846788              | 1.35962                 | 11.7033       | 11.245        | 0.4583         |
| 64 | Mdm2       | 8.76264       | 8.48045       | 0.28219                 | 0.0254071               | 1.21605                 | 9.14069       | 8.68667       | 0.45402        |
| 65 | Il1r1      | 6.61948       | 6.23044       | 0.38904                 | 0.000213572             | 1.30952                 | 6.51401       | 6.06165       | 0.45236        |
| 66 | Vcl        | 10.6462       | 10.3276       | 0.3186                  | 0.0118168               | 1.24712                 | 10.4537       | 10.0116       | 0.4421         |
| 67 | Mrgprf     | 8.47731       | 7.68883       | 0.78848                 | 0.0120274               | 1.72727                 | 8.12447       | 7.68546       | 0.43901        |

|     | A         | B             | C             | D                       | E                       | F                       | G             | H             | I              |
|-----|-----------|---------------|---------------|-------------------------|-------------------------|-------------------------|---------------|---------------|----------------|
| 1   | SYMBOL    | Mean(KO)_exp1 | Mean(WT)_exp1 | log2ratio(KOvs WT)_exp1 | p-value(WT vs. KO)_exp1 | Fold-Change(KO/WT)_exp1 | Mean(KO)_exp2 | Mean(WT)_exp2 | log2ratio_exp2 |
| 68  | Ctsd      | 10.0253       | 9.8452        | 0.1801                  | 0.0355033               | 1.13295                 | 9.63929       | 9.20156       | 0.43773        |
| 69  | Itga11    | 10.7075       | 10.319        | 0.3885                  | 0.0414586               | 1.30903                 | 10.7056       | 10.2805       | 0.4251         |
| 70  | Klf9      | 10.6409       | 10.2087       | 0.4322                  | 0.0443582               | 1.34922                 | 10.5246       | 10.1034       | 0.4212         |
| 71  | Fzd1      | 7.26073       | 6.87771       | 0.38302                 | 0.0183537               | 1.30407                 | 8.50941       | 8.09534       | 0.41407        |
| 72  | Aebp1     | 12.6971       | 12.4299       | 0.2672                  | 0.0153557               | 1.20347                 | 12.6549       | 12.241        | 0.4139         |
| 73  | Dclk1     | 6.8877        | 6.45688       | 0.43082                 | 0.0222223               | 1.348                   | 7.0948        | 6.68539       | 0.40941        |
| 74  | Klhl22    | 8.45376       | 8.20957       | 0.24419                 | 0.0352844               | 1.18443                 | 8.54259       | 8.13483       | 0.40776        |
| 75  | Pappa     | 6.54025       | 6.22334       | 0.31691                 | 0.0322242               | 1.24566                 | 6.66132       | 6.25376       | 0.40756        |
| 76  | Clip1     | 7.10869       | 6.84212       | 0.26657                 | 0.015744                | 1.20295                 | 7.2277        | 6.82094       | 0.40676        |
| 77  | Sel1l     | 8.9966        | 8.77199       | 0.22461                 | 0.00982749              | 1.16847                 | 9.34867       | 8.94729       | 0.40138        |
| 78  | Fbn1      | 9.71171       | 9.41568       | 0.29603                 | 0.0307088               | 1.22776                 | 10.2658       | 9.86721       | 0.39859        |
| 79  | Gria3     | 6.46537       | 6.20704       | 0.25833                 | 0.0067918               | 1.1961                  | 6.4974        | 6.10409       | 0.39331        |
| 80  | Scd1      | 8.86547       | 8.33253       | 0.53294                 | 0.0147557               | 1.44688                 | 8.67608       | 8.28445       | 0.39163        |
| 81  | Sqstm1    | 9.96434       | 9.63577       | 0.32857                 | 0.0244607               | 1.25577                 | 10.1159       | 9.73006       | 0.38584        |
| 82  | Lgi2      | 8.16755       | 7.55322       | 0.61433                 | 0.00290713              | 1.53085                 | 8.14844       | 7.76322       | 0.38522        |
| 83  | LOC100045 | 6.94412       | 6.59481       | 0.34931                 | 0.0292268               | 1.27394                 | 6.80174       | 6.42535       | 0.37639        |
| 84  | Tmem132c  | 6.5419        | 6.08363       | 0.45827                 | 0.0172257               | 1.37389                 | 6.57759       | 6.21385       | 0.36374        |
| 85  | Trim11    | 7.42684       | 7.25141       | 0.17543                 | 0.0407933               | 1.1293                  | 7.46722       | 7.11164       | 0.35558        |
| 86  | Eno2      | 7.40363       | 6.94181       | 0.46182                 | 0.00471241              | 1.37728                 | 7.50748       | 7.18661       | 0.32087        |
| 87  | Zfp516    | 6.73291       | 6.58429       | 0.14862                 | 0.0487243               | 1.10851                 | 6.86602       | 6.56228       | 0.30374        |
| 88  | Car12     | 6.61415       | 6.33807       | 0.27608                 | 0.0160248               | 1.2109                  | 6.64445       | 6.34366       | 0.30079        |
| 89  | Slc1a4    | 9.81086       | 9.4217        | 0.38916                 | 0.0381077               | 1.30963                 | 9.88734       | 9.58666       | 0.30068        |
| 90  | Aox1      | 6.34727       | 6.06734       | 0.27993                 | 0.0255057               | 1.21414                 | 6.37353       | 6.07643       | 0.2971         |
| 91  | Rab11fip5 | 9.3288        | 9.21955       | 0.10925                 | 0.0341536               | 1.07867                 | 9.36513       | 9.07765       | 0.28748        |
| 92  | Coq10b    | 8.69067       | 8.36602       | 0.32465                 | 0.0467361               | 1.25236                 | 8.21611       | 7.93234       | 0.28377        |
| 93  | Zfp532    | 7.00878       | 6.91087       | 0.09791                 | 0.0301438               | 1.07022                 | 6.94999       | 6.66764       | 0.28235        |
| 94  | Tbc1d22a  | 8.81595       | 8.69652       | 0.11943                 | 0.00253415              | 1.08631                 | 9.38126       | 9.112         | 0.26926        |
| 95  | Fasn      | 10.3237       | 9.95817       | 0.36553                 | 0.013545                | 1.2884                  | 10.6114       | 10.3467       | 0.2647         |
| 96  | Cachd1    | 6.40214       | 6.24022       | 0.16192                 | 0.0235586               | 1.11878                 | 6.68801       | 6.44031       | 0.2477         |
| 97  | Tcn2      | 8.19656       | 8.49347       | -0.29691                | 0.0174446               | -1.22851                | 8.17604       | 7.94044       | 0.2356         |
| 98  | LOC100045 | 7.50942       | 7.09117       | 0.41825                 | 0.0260863               | 1.33631                 | 7.49709       | 7.26261       | 0.23448        |
| 99  | Kcns1     | 7.08502       | 6.68951       | 0.39551                 | 0.00726877              | 1.31541                 | 6.94286       | 6.71239       | 0.23047        |
| 100 | Ncoa5     | 7.9421        | 7.78743       | 0.15467                 | 0.0238044               | 1.11317                 | 8.32148       | 8.09648       | 0.225          |

|     | A         | B             | C             | D                       | E                       | F                       | G             | H             | I              |
|-----|-----------|---------------|---------------|-------------------------|-------------------------|-------------------------|---------------|---------------|----------------|
| 1   | SYMBOL    | Mean(KO)_exp1 | Mean(WT)_exp1 | log2ratio(KOvs WT)_exp1 | p-value(WT vs. KO)_exp1 | Fold-Change(KO/WT)_exp1 | Mean(KO)_exp2 | Mean(WT)_exp2 | log2ratio_exp2 |
| 101 | Il11ra1   | 12.5866       | 12.393        | 0.1936                  | 0.0353914               | 1.14369                 | 12.9159       | 12.7261       | 0.1898         |
| 102 | Sars      | 7.86601       | 7.65479       | 0.21122                 | 0.00392972              | 1.15767                 | 7.64195       | 7.4545        | 0.18745        |
| 103 | Rab15     | 8.77621       | 8.50424       | 0.27197                 | 0.012921                | 1.20746                 | 9.19848       | 9.01884       | 0.17964        |
| 104 | Ppap2a    | 8.78336       | 8.51541       | 0.26795                 | 0.037513                | 1.20409                 | 8.6782        | 8.50313       | 0.17507        |
| 105 | Gle1      | 6.93646       | 6.82793       | 0.10853                 | 0.02121                 | 1.07813                 | 6.88575       | 6.73197       | 0.15378        |
| 106 | Snrp70    | 7.16649       | 7.38941       | -0.22292                | 0.0274654               | -1.16709                | 7.02215       | 6.8768        | 0.14535        |
| 107 | Zfp295    | 6.14386       | 6.03603       | 0.10783                 | 0.0195411               | 1.07761                 | 6.09183       | 5.9491        | 0.14273        |
| 108 | Dhcr24    | 6.21452       | 6.0608        | 0.15372                 | 0.0337092               | 1.11243                 | 6.15693       | 6.03364       | 0.12329        |
| 109 | Nr1h2     | 6.81726       | 6.94683       | -0.12957                | 0.0042496               | -1.09396                | 6.84476       | 6.73476       | 0.11           |
| 110 | Vamp4     | 8.46574       | 8.73764       | -0.2719                 | 0.00900001              | -1.2074                 | 8.67627       | 8.57769       | 0.09858        |
| 111 | Sts       | 6.23119       | 6.01565       | 0.21554                 | 0.0309721               | 1.16114                 | 5.9923        | 6.05072       | -0.05842       |
| 112 | Gpm6a     | 5.9111        | 5.98478       | -0.07368                | 0.0164849               | -1.0524                 | 5.78572       | 5.84671       | -0.06099       |
| 113 | Rnf167    | 7.71143       | 7.9111        | -0.19967                | 0.0214377               | -1.14843                | 7.67717       | 7.76189       | -0.08472       |
| 114 | LOC100047 | 7.24325       | 7.52749       | -0.28424                | 0.0311643               | -1.21777                | 7.29211       | 7.39585       | -0.10374       |
| 115 | OTTMUSG   | 5.99283       | 6.16763       | -0.1748                 | 0.0196245               | -1.12881                | 6.07248       | 6.18357       | -0.11109       |
| 116 | LOC676222 | 6.01247       | 6.11527       | -0.1028                 | 0.0369157               | -1.07386                | 5.86144       | 5.9794        | -0.11796       |
| 117 | EG432982  | 6.14214       | 6.28327       | -0.14113                | 0.0160637               | -1.10277                | 6.02541       | 6.15711       | -0.1317        |
| 118 | Slc29a1   | 8.48814       | 8.95028       | -0.46214                | 0.0466004               | -1.37758                | 8.25377       | 8.39831       | -0.14454       |
| 119 | Ccbp2     | 6.35363       | 6.69314       | -0.33951                | 0.0490006               | -1.26533                | 6.18272       | 6.33434       | -0.15162       |
| 120 | AA467197  | 6.13156       | 6.32714       | -0.19558                | 0.0286261               | -1.14518                | 5.94051       | 6.11247       | -0.17196       |
| 121 | Bbs12     | 6.40323       | 6.57816       | -0.17493                | 0.0119832               | -1.12891                | 6.37713       | 6.55528       | -0.17815       |
| 122 | Rpusd4    | 7.68332       | 7.83504       | -0.15172                | 0.0428885               | -1.1109                 | 7.99592       | 8.19265       | -0.19673       |
| 123 | Tmem159   | 7.4924        | 7.70935       | -0.21695                | 0.0146168               | -1.16227                | 7.54403       | 7.74109       | -0.19706       |
| 124 | Bcas3     | 9.70087       | 9.99109       | -0.29022                | 0.0200827               | -1.22283                | 9.8132        | 10.0261       | -0.2129        |
| 125 | Cib3      | 5.83739       | 6.12057       | -0.28318                | 0.0273138               | -1.21688                | 5.7747        | 5.99809       | -0.22339       |
| 126 | Cr1l      | 6.62756       | 7.03906       | -0.4115                 | 0.0140681               | -1.33007                | 6.92056       | 7.1528        | -0.23224       |
| 127 | 9330154J0 | 6.346         | 6.63498       | -0.28898                | 0.0256881               | -1.22177                | 6.25539       | 6.49105       | -0.23566       |
| 128 | 5730403B1 | 7.61842       | 7.88442       | -0.266                  | 0.00615409              | -1.20246                | 7.19922       | 7.43721       | -0.23799       |
| 129 | LOC100044 | 6.56285       | 6.94499       | -0.38214                | 0.0430746               | -1.30328                | 6.46835       | 6.73077       | -0.26242       |
| 130 | Ncald     | 6.96412       | 7.21009       | -0.24597                | 0.00172599              | -1.1859                 | 7.35939       | 7.62183       | -0.26244       |
| 131 | H2-T10    | 6.61907       | 6.87405       | -0.25498                | 0.0218153               | -1.19332                | 6.29225       | 6.56159       | -0.26934       |
| 132 | Gimap1    | 5.85792       | 6.00311       | -0.14519                | 0.00281777              | -1.10587                | 5.72887       | 6.01326       | -0.28439       |
| 133 | Arid5b    | 5.95298       | 5.83436       | 0.11862                 | 0.0156498               | 1.08569                 | 5.81551       | 6.10142       | -0.28591       |

|     | A         | B             | C             | D                       | E                       | F                       | G             | H             | I              |
|-----|-----------|---------------|---------------|-------------------------|-------------------------|-------------------------|---------------|---------------|----------------|
| 1   | SYMBOL    | Mean(KO)_exp1 | Mean(WT)_exp1 | log2ratio(KOvs WT)_exp1 | p-value(WT vs. KO)_exp1 | Fold-Change(KO/WT)_exp1 | Mean(KO)_exp2 | Mean(WT)_exp2 | log2ratio_exp2 |
| 134 | Fahd2a    | 6.37975       | 6.59458       | -0.21483                | 0.00131395              | -1.16058                | 6.16769       | 6.45929       | -0.2916        |
| 135 | Ctsw      | 6.22623       | 6.78592       | -0.55969                | 0.0108038               | -1.47395                | 5.75115       | 6.05458       | -0.30343       |
| 136 | Sytl4     | 6.69992       | 7.07951       | -0.37959                | 0.0335988               | -1.30097                | 6.56936       | 6.8732        | -0.30384       |
| 137 | Rbm11     | 6.00737       | 6.21656       | -0.20919                | 0.0111039               | -1.15604                | 5.9265        | 6.23538       | -0.30888       |
| 138 | Cd200     | 8.08096       | 8.76116       | -0.6802                 | 0.00142161              | -1.60237                | 8.13535       | 8.45118       | -0.31583       |
| 139 | 8430408G2 | 6.328         | 6.89071       | -0.56271                | 0.0362379               | -1.47704                | 6.1292        | 6.45975       | -0.33055       |
| 140 | Gper      | 7.0049        | 7.48713       | -0.48223                | 0.012422                | -1.39691                | 7.0421        | 7.37864       | -0.33654       |
| 141 | Rhbdl3    | 6.22329       | 6.47405       | -0.25076                | 0.0387761               | -1.18984                | 5.98986       | 6.34642       | -0.35656       |
| 142 | Ccdc3     | 11.2287       | 11.8974       | -0.6687                 | 0.00399925              | -1.58969                | 11.3198       | 11.6809       | -0.3611        |
| 143 | Prdx4     | 11.8267       | 12.0829       | -0.2562                 | 0.0415112               | -1.19433                | 11.8212       | 12.1845       | -0.3633        |
| 144 | Nqo2      | 6.85409       | 7.17569       | -0.3216                 | 0.00726951              | -1.24972                | 6.68341       | 7.05173       | -0.36832       |
| 145 | Sort1     | 7.82098       | 8.22948       | -0.4085                 | 0.0147834               | -1.32731                | 7.88721       | 8.25834       | -0.37113       |
| 146 | Pfkl      | 9.01056       | 9.32901       | -0.31845                | 0.00815908              | -1.24699                | 8.81376       | 9.18569       | -0.37193       |
| 147 | Dapk2     | 6.99984       | 7.37137       | -0.37153                | 0.00179676              | -1.29372                | 6.79814       | 7.18109       | -0.38295       |
| 148 | Adam12    | 6.50119       | 6.94207       | -0.44088                | 0.0118003               | -1.35743                | 6.62783       | 7.02118       | -0.39335       |
| 149 | Wif1      | 9.62521       | 10.1892       | -0.56399                | 0.0266657               | -1.4784                 | 9.93766       | 10.3333       | -0.39564       |
| 150 | Cxcl12    | 9.04152       | 9.57983       | -0.53831                | 0.0435781               | -1.45227                | 9.35234       | 9.74877       | -0.39643       |
| 151 | Dner      | 7.80442       | 8.44144       | -0.63702                | 0.000864277             | -1.55511                | 8.18963       | 8.5972        | -0.40757       |
| 152 | 2310005E1 | 7.12587       | 7.39604       | -0.27017                | 0.0367852               | -1.20594                | 6.81121       | 7.239         | -0.42779       |
| 153 | St3gal6   | 8.47981       | 9.16026       | -0.68045                | 0.0181543               | -1.60264                | 8.41924       | 8.8631        | -0.44386       |
| 154 | Ranbp3l   | 6.6712        | 7.58412       | -0.91292                | 0.0144707               | -1.88286                | 6.98289       | 7.45112       | -0.46823       |
| 155 | Gfra1     | 6.82775       | 7.47475       | -0.647                  | 0.00666123              | -1.5659                 | 6.98846       | 7.46242       | -0.47396       |
| 156 | Prr15     | 7.27853       | 7.95423       | -0.6757                 | 0.0117969               | -1.59737                | 7.19272       | 7.69694       | -0.50422       |
| 157 | Cdk5r1    | 7.26451       | 7.85117       | -0.58666                | 0.00200548              | -1.50176                | 7.44875       | 8.02529       | -0.57654       |
| 158 | Hdac3     | 8.28298       | 9.54559       | -1.26261                | 0.00383398              | -2.3993                 | 9.12609       | 9.71985       | -0.59376       |
| 159 | Cmb1      | 6.15889       | 6.40181       | -0.24292                | 0.0299817               | -1.18339                | 6.1345        | 6.72966       | -0.59516       |
| 160 | Vit       | 7.80333       | 9.02659       | -1.22326                | 0.0311736               | -2.33474                | 8.23814       | 8.83641       | -0.59827       |
| 161 | Rbp7      | 6.13913       | 6.386         | -0.24687                | 0.0395521               | -1.18664                | 6.0087        | 6.61723       | -0.60853       |
| 162 | Ndufa1    | 11.4888       | 11.8619       | -0.3731                 | 0.0412521               | -1.2952                 | 11.1637       | 11.7744       | -0.6107        |
| 163 | Hey1      | 7.88567       | 8.62942       | -0.74375                | 0.0105763               | -1.67452                | 7.51808       | 8.15097       | -0.63289       |
| 164 | Ankrd37   | 6.15846       | 6.72737       | -0.56891                | 0.0233644               | -1.4834                 | 6.03479       | 6.66876       | -0.63397       |
| 165 | Hpgd      | 8.6545        | 9.64361       | -0.98911                | 0.000998965             | -1.98496                | 8.89629       | 9.57069       | -0.6744        |
| 166 | Cd59b     | 6.71051       | 7.37713       | -0.66662                | 0.00694943              | -1.58736                | 6.61842       | 7.2931        | -0.67468       |

|     | A         | B                 | C                | D                          | E                          | F                               | G                 | H                 | I                  |
|-----|-----------|-------------------|------------------|----------------------------|----------------------------|---------------------------------|-------------------|-------------------|--------------------|
| 1   | SYMBOL    | Mean(KO)_e<br>xp1 | Mean(WT)<br>exp1 | log2ratio(KOvs<br>WT)_exp1 | p-value(WT vs.<br>KO)_exp1 | Fold-<br>Change(KO/WT<br>)_exp1 | Mean(KO)_<br>exp2 | Mean(WT)_ex<br>p2 | log2ratio_<br>exp2 |
| 167 | Icam2     | 7.47721           | 8.09953          | -0.62232                   | 0.00244788                 | -1.53934                        | 7.72724           | 8.40347           | -0.67623           |
| 168 | Serpina3g | 7.00826           | 8.19119          | -1.18293                   | 0.0341934                  | -2.27039                        | 7.27912           | 7.97434           | -0.69522           |
| 169 | Gpihbp1   | 8.18426           | 8.78083          | -0.59657                   | 0.0408673                  | -1.51212                        | 8.07534           | 8.86071           | -0.78537           |
| 170 | Entpd3    | 10.6653           | 11.4316          | -0.7663                    | 0.00226235                 | -1.70096                        | 10.3858           | 11.1719           | -0.7861            |
| 171 | Cd59a     | 8.97001           | 9.53288          | -0.56287                   | 0.0182944                  | -1.47721                        | 8.93431           | 9.91052           | -0.97621           |
| 172 | Sct       | 6.05268           | 6.42118          | -0.3685                    | 0.0329781                  | -1.29101                        | 6.0067            | 6.98379           | -0.97709           |
| 173 | Mepe      | 7.84893           | 8.78899          | -0.94006                   | 0.00377094                 | -1.91861                        | 6.90969           | 7.99804           | -1.08835           |
| 174 | Rsad2     | 6.79095           | 7.97154          | -1.18059                   | 0.00934478                 | -2.26669                        | 6.81371           | 7.91135           | -1.09764           |
| 175 | Alas2     | 7.34878           | 8.92497          | -1.57619                   | 0.0407246                  | -2.98182                        | 7.64422           | 8.7672            | -1.12298           |
| 176 | Ramp1     | 8.32506           | 9.33727          | -1.01221                   | 0.000460241                | -2.017                          | 7.98986           | 9.36527           | -1.37541           |
| 177 | S100a8    | 8.32825           | 10.7332          | -2.40495                   | 0.0427049                  | -5.29635                        | 7.75036           | 10.9787           | -3.22834           |

|    | J                       | K                            | L                           | M      | N      | O      | P           | Q         | R              | S         |
|----|-------------------------|------------------------------|-----------------------------|--------|--------|--------|-------------|-----------|----------------|-----------|
| 1  | p-value(KO vs. WT)_exp2 | FDR(p-value(KO vs. WT))_exp2 | Fold-Change(KO vs. WT)_exp2 | FC>1SD | FC>2SD | FC>3SD | CHROMO SOME | CYTOBAN D | ENTREZ_GENE_ID | ILMN_GENE |
| 2  | 0.00715871              | 0.526724                     | 3.37979                     | TRUE   | TRUE   | TRUE   | 17          | 17qA3.3   | 12575          | CDKN1A    |
| 3  | 0.000560381             | 0.509961                     | 2.86222                     | TRUE   | TRUE   | TRUE   | 1           | 1qH4      | 13849          | EPHX1     |
| 4  | 0.004289                | 0.516318                     | 2.1731                      | TRUE   | TRUE   | TRUE   |             |           |                | PLAT      |
| 5  | 0.0489971               | 0.561001                     | 2.14568                     | TRUE   | TRUE   | FALSE  | 9           | 9qA3      | 15894          | ICAM1     |
| 6  | 0.00230393              | 0.516318                     | 2.12246                     | TRUE   | TRUE   | TRUE   |             |           |                | AB023957  |
| 7  | 0.016333                | 0.538897                     | 2.12203                     | TRUE   | TRUE   | TRUE   | 1           | 1qE4      | 27280          | PHLDA3    |
| 8  | 0.0305405               | 0.553513                     | 1.9565                      | TRUE   | TRUE   | TRUE   | 8           | 8qE2      | 18186          | NRP1      |
| 9  | 0.00577256              | 0.516318                     | 1.93134                     | TRUE   | TRUE   | TRUE   | 17          | 17qE3     | 68027          | TMEM178   |
| 10 | 0.0139083               | 0.538897                     | 1.87293                     | TRUE   | TRUE   | FALSE  | 6           | 6qB2.3    | 93695          | GPNMB     |
| 11 | 0.0196987               | 0.538897                     | 1.87232                     | TRUE   | TRUE   | FALSE  | 8           | 8qC5      | 17390          | MMP2      |
| 12 | 0.0109191               | 0.538897                     | 1.82212                     | TRUE   | FALSE  | FALSE  | 15          | 15qD1     | 18383          | TNFRSF11  |
| 13 | 0.0135283               | 0.538897                     | 1.75106                     | TRUE   | TRUE   | FALSE  |             | 8qA1.1    | 14456          | GAS6      |
| 14 | 0.000343565             | 0.509961                     | 1.72535                     | TRUE   | TRUE   | FALSE  | 1           | 1qH2.2    | 116914         | SLC19A2   |
| 15 | 0.00293133              | 0.516318                     | 1.7157                      | TRUE   | TRUE   | FALSE  | 6           | 6qD1      | 74122          | TMEM43    |
| 16 | 0.0392052               | 0.559686                     | 1.69529                     | TRUE   | TRUE   | FALSE  | 14          | 14qB      | 11752          | ANXA8     |
| 17 | 0.0215248               | 0.538897                     | 1.69185                     | TRUE   | TRUE   | FALSE  | 10          | 10qB4     | 71279          | SLC29A3   |
| 18 | 0.00667087              | 0.526724                     | 1.68527                     | TRUE   | TRUE   | FALSE  | 10          | 10qC1     | 21859          | TIMP3     |
| 19 | 0.00132607              | 0.516318                     | 1.67929                     | TRUE   | TRUE   | FALSE  |             |           | 1E+08          | LOC100046 |
| 20 | 0.0172062               | 0.538897                     | 1.67403                     | TRUE   | TRUE   | FALSE  |             | 10qB5.3   | 66859          | SLC16A9   |
| 21 | 0.0301927               | 0.553513                     | 1.67143                     | TRUE   | TRUE   | FALSE  | 3           | 3qF2.3    | 14867          | GSTM6     |
| 22 | 0.02275                 | 0.541998                     | 1.65763                     | TRUE   | TRUE   | FALSE  | 15          | 15qF3     | 223921         | AAAS      |
| 23 | 0.0317857               | 0.553513                     | 1.65541                     | TRUE   | FALSE  | FALSE  |             | 9qC       | 22003          | TPM1      |
| 24 | 0.0103278               | 0.538897                     | 1.65203                     | TRUE   | TRUE   | FALSE  | 12          | 12qF1     | 382643         | AHNAK2    |
| 25 | 0.00517615              | 0.516318                     | 1.64988                     | TRUE   | TRUE   | FALSE  | 6           | 6qA3.3    | 20336          | EXOC4     |
| 26 | 0.013171                | 0.538897                     | 1.647                       | TRUE   | TRUE   | FALSE  | 10          | 10qD2     | 14160          | LGR5      |
| 27 | 0.0179439               | 0.538897                     | 1.62358                     | TRUE   | TRUE   | FALSE  |             |           |                | E430002G0 |
| 28 | 0.0164665               | 0.538897                     | 1.5998                      | TRUE   | TRUE   | FALSE  | 1           | 1qE4      | 116847         | PRELP     |
| 29 | 0.0216367               | 0.538897                     | 1.59701                     | TRUE   | TRUE   | FALSE  | 8           | 8qB3.1    | 72333          | PALLD     |
| 30 | 0.0499315               | 0.561001                     | 1.59321                     | TRUE   | TRUE   | FALSE  |             |           | 1E+08          | LOC100047 |
| 31 | 0.0114724               | 0.538897                     | 1.57621                     | TRUE   | TRUE   | FALSE  | 12          | 12qF1     | 58208          | BCL11B    |
| 32 | 0.0208177               | 0.538897                     | 1.57294                     | TRUE   | FALSE  | FALSE  | 3           | 3qF2.2    | 15360          | HMGCS2    |
| 33 | 0.00579911              | 0.516318                     | 1.56666                     | TRUE   | TRUE   | FALSE  | 19          | 19qC3     | 20250          | SCD2      |
| 34 | 0.00569741              | 0.516318                     | 1.53678                     | TRUE   | FALSE  | FALSE  | 13          | 13qD1     | 27015          | POLK      |

|    | J                       | K                            | L                           | M      | N      | O      | P           | Q         | R              | S          |
|----|-------------------------|------------------------------|-----------------------------|--------|--------|--------|-------------|-----------|----------------|------------|
| 1  | p-value(KO vs. WT)_exp2 | FDR(p-value(KO vs. WT))_exp2 | Fold-Change(KO vs. WT)_exp2 | FC>1SD | FC>2SD | FC>3SD | CHROMO SOME | CYTOBAN D | ENTREZ_GENE_ID | ILMN_GENE  |
| 35 | 0.00458751              | 0.516318                     | 1.53306                     | TRUE   | TRUE   | FALSE  | 11          | 11qE2     | 19039          | LGALS3BP   |
| 36 | 0.026973                | 0.550491                     | 1.51528                     | TRUE   | TRUE   | FALSE  |             |           |                | ANGPTL4    |
| 37 | 0.0442174               | 0.561001                     | 1.50923                     | TRUE   | TRUE   | FALSE  |             | 5qG3      | 70717          | 6330406115 |
| 38 | 0.00307893              | 0.516318                     | 1.50802                     | TRUE   | TRUE   | FALSE  | 2           | 2qG2      | 18503          | PAX1       |
| 39 | 0.0158684               | 0.538897                     | 1.50236                     | TRUE   | TRUE   | FALSE  |             |           |                | CXCL2      |
| 40 | 0.035878                | 0.554215                     | 1.49594                     | FALSE  | FALSE  | FALSE  | 8           | 8qC1      | 13617          | EDNRA      |
| 41 | 0.0438276               | 0.561001                     | 1.46901                     | TRUE   | FALSE  | FALSE  | 13          | 13qA2     | 20379          | SFRP4      |
| 42 | 0.0434642               | 0.561001                     | 1.45307                     | FALSE  | FALSE  | FALSE  | 10          | 10qC1     | 13629          | EEF2       |
| 43 | 0.0389256               | 0.559338                     | 1.45143                     | FALSE  | FALSE  | FALSE  |             | 1qH2.2    | 11931          | ATP1B1     |
| 44 | 0.0160864               | 0.538897                     | 1.4472                      | TRUE   | FALSE  | FALSE  | 13          | 13qB1     | 26564          | ROR2       |
| 45 | 0.044801                | 0.561001                     | 1.44516                     | TRUE   | FALSE  | FALSE  | 17          | 17qA2     | 21826          | THBS2      |
| 46 | 0.0282653               | 0.550491                     | 1.44223                     | TRUE   | FALSE  | FALSE  | 11          | 11qB1.1   | 74315          | RNF145     |
| 47 | 0.0017075               | 0.516318                     | 1.44101                     | TRUE   | FALSE  | FALSE  | 11          | 11qD      | 16010          | IGFBP4     |
| 48 | 0.0320138               | 0.553513                     | 1.42426                     | TRUE   | FALSE  | FALSE  | 1           | 1qC4      | 57814          | KCNE4      |
| 49 | 0.0199453               | 0.538897                     | 1.41753                     | TRUE   | FALSE  | FALSE  | 2           | 2qA3      | 12831          | COL5A1     |
| 50 | 0.00934591              | 0.538897                     | 1.4149                      | TRUE   | FALSE  | FALSE  | 4           | 4qA5      | 14595          | B4GALT1    |
| 51 | 0.0187568               | 0.538897                     | 1.41305                     | TRUE   | FALSE  | FALSE  | 7           | 7qF5      | 12443          | CCND1      |
| 52 | 0.000747127             | 0.509961                     | 1.41268                     | FALSE  | FALSE  | FALSE  | 1           | 1qC1.3    | 14369          | FZD7       |
| 53 | 0.0323077               | 0.553513                     | 1.40571                     | TRUE   | FALSE  | FALSE  | 11          | 11qE1     | 12006          | AXIN2      |
| 54 | 0.0135134               | 0.538897                     | 1.39854                     | TRUE   | FALSE  | FALSE  | 18          | 18qB2     | 12475          | CD14       |
| 55 | 0.025233                | 0.550491                     | 1.39748                     | TRUE   | FALSE  | FALSE  | X           | XqF1      | 18823          | PLP1       |
| 56 | 0.0179843               | 0.538897                     | 1.39631                     | TRUE   | FALSE  | FALSE  | 5           | 5qB1      | 100952         | EMILIN1    |
| 57 | 0.0329883               | 0.553513                     | 1.39601                     | TRUE   | FALSE  | FALSE  | 2           | 2qB       | 26360          | ANGPTL2    |
| 58 | 0.0323454               | 0.553513                     | 1.39315                     | TRUE   | FALSE  | FALSE  | 8           | 8qE1      | 13479          | DPEP1      |
| 59 | 0.00605563              | 0.516318                     | 1.38016                     | TRUE   | FALSE  | FALSE  | 11          | 11qD      | 12291          | CACNA1G    |
| 60 | 0.0327037               | 0.553513                     | 1.37797                     | TRUE   | FALSE  | FALSE  |             | 3qG3      | 74442          | SGMS2      |
| 61 | 0.00833744              | 0.538456                     | 1.37624                     | FALSE  | FALSE  | FALSE  | 14          | 14qC3     | 73181          | NFATC4     |
| 62 | 0.0267373               | 0.550491                     | 1.3762                      | TRUE   | FALSE  | FALSE  |             |           |                | MAPKAPK3   |
| 63 | 0.0406852               | 0.559731                     | 1.37394                     | TRUE   | FALSE  | FALSE  | 3           | 3qF1      | 16905          | LMNA       |
| 64 | 0.040279                | 0.559731                     | 1.36985                     | TRUE   | FALSE  | FALSE  | 10          | 10qD2     | 17246          | MDM2       |
| 65 | 0.00300294              | 0.516318                     | 1.36828                     | TRUE   | FALSE  | FALSE  | 1           | 1qB       | 17082          | IL1RL1     |
| 66 | 0.0194233               | 0.538897                     | 1.35858                     | TRUE   | FALSE  | FALSE  | 14          | 14qA3     | 22330          | VCL        |
| 67 | 0.049069                | 0.561001                     | 1.35568                     | TRUE   | FALSE  | FALSE  | 7           | 7qF5      | 211577         | MIRGPRF    |



|     | J                       | K                            | L                           | M      | N      | O      | P           | Q          | R              | S         |
|-----|-------------------------|------------------------------|-----------------------------|--------|--------|--------|-------------|------------|----------------|-----------|
| 1   | p-value(KO vs. WT)_exp2 | FDR(p-value(KO vs. WT))_exp2 | Fold-Change(KO vs. WT)_exp2 | FC>1SD | FC>2SD | FC>3SD | CHROMO SOME | CYTOBAN D  | ENTREZ_GENE_ID | ILMN_GENE |
| 68  | 0.0146076               | 0.538897                     | 1.35448                     | FALSE  | FALSE  | FALSE  |             | 7 7qF5     | 13033          | CTSD      |
| 69  | 0.0412588               | 0.559731                     | 1.34266                     | TRUE   | FALSE  | FALSE  |             | 9 9qB      | 319480         | ITGA11    |
| 70  | 0.0368359               | 0.554215                     | 1.3391                      | TRUE   | FALSE  | FALSE  |             | 19qB       | 16601          | KLF9      |
| 71  | 0.0225729               | 0.5418                       | 1.33244                     | TRUE   | FALSE  | FALSE  |             | 5 5qA1     | 14362          | FZD1      |
| 72  | 0.0395158               | 0.559731                     | 1.33225                     | TRUE   | FALSE  | FALSE  |             | 11 11qA1   | 11568          | AEBP1     |
| 73  | 0.0367327               | 0.554215                     | 1.32814                     | TRUE   | FALSE  | FALSE  |             | 3 3qC      | 13175          | DCLK1     |
| 74  | 0.0151515               | 0.538897                     | 1.32662                     | TRUE   | FALSE  | FALSE  |             | 16 16qA3   | 224023         | KLHL22    |
| 75  | 0.0223753               | 0.54062                      | 1.32644                     | TRUE   | FALSE  | FALSE  |             | 4 4qC1     | 18491          | PAPPA     |
| 76  | 0.0413566               | 0.559731                     | 1.3257                      | TRUE   | FALSE  | FALSE  |             | 5qF        | 56430          | CLIP1     |
| 77  | 0.0488547               | 0.561001                     | 1.32077                     | TRUE   | FALSE  | FALSE  |             | 12 12qD3   | 20338          | SEL1L     |
| 78  | 0.028268                | 0.550491                     | 1.31821                     | TRUE   | FALSE  | FALSE  |             | 2 2qF1     | 14118          | FBN1      |
| 79  | 0.00624611              | 0.516318                     | 1.3134                      | TRUE   | FALSE  | FALSE  | X           | XqA3.3-qA4 | 53623          | GRIA3     |
| 80  | 0.0281472               | 0.550491                     | 1.31188                     | TRUE   | FALSE  | FALSE  |             | 19 19qC3   | 20249          | SCD1      |
| 81  | 0.0341441               | 0.554215                     | 1.30665                     | TRUE   | FALSE  | FALSE  |             | 11 11qB1.3 | 18412          | SQSTM1    |
| 82  | 0.0329275               | 0.553513                     | 1.30606                     | TRUE   | FALSE  | FALSE  |             | 5 5qC1     | 246316         | LGI2      |
| 83  | 0.0492734               | 0.561001                     | 1.29808                     | TRUE   | FALSE  | FALSE  |             |            | 1E+08          | LOC100049 |
| 84  | 0.0134865               | 0.538897                     | 1.28676                     | TRUE   | FALSE  | FALSE  |             | 5qG1.2     | 208213         | TMEM132C  |
| 85  | 0.00719799              | 0.526724                     | 1.27949                     | FALSE  | FALSE  | FALSE  |             | 11 11qB1.3 | 94091          | TRIM11    |
| 86  | 0.0485795               | 0.561001                     | 1.24908                     | TRUE   | FALSE  | FALSE  |             | 6 6qF2     | 13807          | ENO2      |
| 87  | 0.048232                | 0.561001                     | 1.23434                     | FALSE  | FALSE  | FALSE  |             | 18 18qE3   | 329003         | ZFP516    |
| 88  | 0.00357038              | 0.516318                     | 1.23182                     | TRUE   | FALSE  | FALSE  |             |            |                | CAR12     |
| 89  | 0.010622                | 0.538897                     | 1.23173                     | TRUE   | FALSE  | FALSE  |             | 11 11qA3.1 | 55963          | SLC1A4    |
| 90  | 0.0207888               | 0.538897                     | 1.22867                     | TRUE   | FALSE  | FALSE  |             | 1 1qC1.3   | 11761          | AOX1      |
| 91  | 0.0189763               | 0.538897                     | 1.22051                     | FALSE  | FALSE  | FALSE  |             | 6 6qC3     | 52055          | RAB11FIP5 |
| 92  | 0.00969765              | 0.538897                     | 1.21737                     | FALSE  | FALSE  | FALSE  |             | 1 1qC1.2   | 67876          | COQ10B    |
| 93  | 0.0274262               | 0.550491                     | 1.21618                     | FALSE  | FALSE  | FALSE  |             | 18 18qE1   | 328977         | ZFP532    |
| 94  | 0.027494                | 0.550491                     | 1.20519                     | FALSE  | FALSE  | FALSE  |             | 15 15qE2   | 223754         | TBC1D22A  |
| 95  | 0.0464932               | 0.561001                     | 1.20141                     | FALSE  | FALSE  | FALSE  |             | 11 11qE2   | 14104          | FASN      |
| 96  | 0.0266576               | 0.550491                     | 1.18732                     | FALSE  | FALSE  | FALSE  |             | 4 4qC6     | 320508         | CACHD1    |
| 97  | 0.0311764               | 0.553513                     | 1.17739                     | FALSE  | FALSE  | FALSE  |             | 11 11qA1   | 21452          | TCN2      |
| 98  | 0.0351795               | 0.554215                     | 1.17648                     | FALSE  | FALSE  | FALSE  |             |            | 1E+08          | LOC100049 |
| 99  | 0.0300486               | 0.553513                     | 1.17322                     | FALSE  | FALSE  | FALSE  |             | 2 2qH3     | 16538          | KCNS1     |
| 100 | 0.0162302               | 0.538897                     | 1.16877                     | FALSE  | FALSE  | FALSE  |             | 2 2qH3     | 228869         | NCOA5     |

|     | J                       | K                            | L                           | M      | N      | O      | P           | Q         | R              | S         |
|-----|-------------------------|------------------------------|-----------------------------|--------|--------|--------|-------------|-----------|----------------|-----------|
| 1   | p-value(KO vs. WT)_exp2 | FDR(p-value(KO vs. WT))_exp2 | Fold-Change(KO vs. WT)_exp2 | FC>1SD | FC>2SD | FC>3SD | CHROMO SOME | CYTOBAN D | ENTREZ_GENE_ID | ILMN_GENE |
| 101 | 0.0026224               | 0.516318                     | 1.1406                      | FALSE  | FALSE  | FALSE  | 4           | 4qA5      | 16157          | IL11RA1   |
| 102 | 0.0266158               | 0.550491                     | 1.13875                     | FALSE  | FALSE  | FALSE  | 3           | 3qF3      | 20226          | SARS      |
| 103 | 0.0143911               | 0.538897                     | 1.1326                      | FALSE  | FALSE  | FALSE  | 12          | 12qC3     | 104886         | RAB15     |
| 104 | 0.00236728              | 0.516318                     | 1.12902                     | FALSE  | FALSE  | FALSE  | 13          | 13qD2.2   | 19012          | PPAP2A    |
| 105 | 0.027648                | 0.550491                     | 1.11248                     | FALSE  | FALSE  | FALSE  | 2           | 2qB       | 74412          | GLE1      |
| 106 | 0.00186532              | 0.516318                     | 1.10599                     | FALSE  | FALSE  | FALSE  | 7           | 7qB4      | 20637          | SNRP70    |
| 107 | 0.0268358               | 0.550491                     | 1.104                       | FALSE  | FALSE  | FALSE  | 16          | 16qC4     | 114565         | ZFP295    |
| 108 | 0.0461893               | 0.561001                     | 1.08922                     | FALSE  | FALSE  | FALSE  | 4           | 4qC7      | 74754          | DHCR24    |
| 109 | 0.0167724               | 0.538897                     | 1.07923                     | FALSE  | FALSE  | FALSE  |             |           |                | NR1H2     |
| 110 | 0.0302619               | 0.553513                     | 1.07072                     | FALSE  | FALSE  | FALSE  | 1           | 1qH2.1    | 53330          | VAMP4     |
| 111 | 0.0389743               | 0.559338                     | -1.04133                    | FALSE  | FALSE  | FALSE  |             |           | 20905          | STS       |
| 112 | 0.0362398               | 0.554215                     | -1.04318                    | FALSE  | FALSE  | FALSE  |             | 8qB1.3    | 234267         | GPM6A     |
| 113 | 0.00366052              | 0.516318                     | -1.06048                    | FALSE  | FALSE  | FALSE  | 11          | 11qB3     | 70510          | RNF167    |
| 114 | 0.0335408               | 0.553513                     | -1.07456                    | FALSE  | FALSE  | FALSE  |             |           | 1E+08          | LOC10004  |
| 115 | 0.0326459               | 0.553513                     | -1.08005                    | FALSE  | FALSE  | FALSE  | 11          | 11qD      | 629873         | OTTMUSG   |
| 116 | 0.00604421              | 0.516318                     | -1.08521                    | FALSE  | FALSE  | FALSE  |             |           | 676222         | LOC676222 |
| 117 | 0.0266307               | 0.550491                     | -1.09558                    | FALSE  | FALSE  | FALSE  | 15          | 15qF1     | 432982         | EG432982  |
| 118 | 0.0318552               | 0.553513                     | -1.10538                    | FALSE  | FALSE  | FALSE  | 17          | 17qB3     | 63959          | SLC29A1   |
| 119 | 0.0386245               | 0.55796                      | -1.11081                    | FALSE  | FALSE  | FALSE  | 9           | 9qF4      | 59289          | CCBP2     |
| 120 | 0.0154735               | 0.538897                     | -1.12659                    | FALSE  | FALSE  | FALSE  | 2           | 2qE5      | 433470         | AA467197  |
| 121 | 0.0370829               | 0.554215                     | -1.13143                    | FALSE  | FALSE  | FALSE  | 3           | 3qB       | 241950         | BBS12     |
| 122 | 0.0485111               | 0.561001                     | -1.1461                     | FALSE  | FALSE  | FALSE  | 9           | 9qA4      | 71989          | RPUSD4    |
| 123 | 0.0389759               | 0.559338                     | -1.14636                    | FALSE  | FALSE  | FALSE  | 7           | 7qF2      | 233806         | TMEM159   |
| 124 | 0.0465533               | 0.561001                     | -1.15902                    | FALSE  | FALSE  | FALSE  | 11          | 11qC      | 192197         | BCAS3     |
| 125 | 0.0129191               | 0.538897                     | -1.16747                    | FALSE  | FALSE  | FALSE  |             | 8qB3.3    | 234421         | CIB3      |
| 126 | 0.0344329               | 0.554215                     | -1.17466                    | FALSE  | FALSE  | FALSE  | 1           | 1qH6      | 12946          | CR1L      |
| 127 | 0.0257256               | 0.550491                     | -1.17745                    | FALSE  | FALSE  | FALSE  |             |           |                | 9330154J0 |
| 128 | 0.0477843               | 0.561001                     | -1.17935                    | FALSE  | FALSE  | FALSE  |             | 16qA1     | 66626          | 5730403B1 |
| 129 | 0.000325734             | 0.509961                     | -1.19949                    | FALSE  | FALSE  | FALSE  |             |           | 1E+08          | LOC10004  |
| 130 | 0.0478787               | 0.561001                     | -1.19951                    | FALSE  | FALSE  | FALSE  | 15          | 15qB3.1   | 52589          | NCALD     |
| 131 | 0.0309728               | 0.553513                     | -1.20525                    | FALSE  | FALSE  | FALSE  | 17          | 17qB1     | 15024          | H2-T10    |
| 132 | 0.00146143              | 0.516318                     | -1.2179                     | FALSE  | FALSE  | FALSE  | 6           | 6qB2.3    | 16205          | GIMAP1    |
| 133 | 0.0395484               | 0.559731                     | -1.21918                    | FALSE  | FALSE  | FALSE  |             |           |                | ARID5B    |

|     | J                       | K                            | L                           | M      | N      | O      | P           | Q         | R              | S         |           |
|-----|-------------------------|------------------------------|-----------------------------|--------|--------|--------|-------------|-----------|----------------|-----------|-----------|
| 1   | p-value(KO vs. WT)_exp2 | FDR(p-value(KO vs. WT))_exp2 | Fold-Change(KO vs. WT)_exp2 | FC>1SD | FC>2SD | FC>3SD | CHROMO SOME | CYTOBAN D | ENTREZ_GENE ID | ILMN_GENE |           |
| 134 | 0.0271714               | 0.550491                     | -1.224                      | TRUE   | FALSE  | FALSE  |             | 2         | 2qF1           | 68126     | FAHD2A    |
| 135 | 0.0385405               | 0.55796                      | -1.23408                    | TRUE   | FALSE  | FALSE  |             | 19        | 19qA           | 13041     | CTSW      |
| 136 | 0.0449376               | 0.561001                     | -1.23443                    | TRUE   | FALSE  | FALSE  | X           |           | XqE3           | 27359     | SYTL4     |
| 137 | 0.00278383              | 0.516318                     | -1.23875                    | TRUE   | FALSE  | FALSE  |             | 16        | 16qC3.1        | 224344    | RBM11     |
| 138 | 0.0274346               | 0.550491                     | -1.24473                    | TRUE   | FALSE  | FALSE  |             | 16        | 16qB5          | 17470     | CD200     |
| 139 | 0.0470799               | 0.561001                     | -1.25749                    | TRUE   | FALSE  | FALSE  |             | 6         | 6qE3           | 213393    | 8430408G2 |
| 140 | 0.0105584               | 0.538897                     | -1.26272                    | TRUE   | FALSE  | FALSE  |             | 5         | 5qG2           | 76854     | GPER      |
| 141 | 0.0133114               | 0.538897                     | -1.28037                    | TRUE   | FALSE  | FALSE  |             | 11        | 11qB5          | 246104    | RHBDL3    |
| 142 | 0.00753683              | 0.538456                     | -1.28441                    | TRUE   | FALSE  | FALSE  |             | 2         | 2qA1           | 74186     | CCDC3     |
| 143 | 0.00912965              | 0.538897                     | -1.28636                    | TRUE   | FALSE  | FALSE  |             |           | XqF3           | 53381     | PRDX4     |
| 144 | 0.0251726               | 0.550491                     | -1.29085                    | TRUE   | FALSE  | FALSE  |             | 13        | 13qA3.3        | 18105     | NQO2      |
| 145 | 0.0112149               | 0.538897                     | -1.29337                    | TRUE   | FALSE  | FALSE  |             | 3         | 3qF3           | 20661     | SORT1     |
| 146 | 0.0447902               | 0.561001                     | -1.29408                    | TRUE   | FALSE  | FALSE  |             | 10        | 10qC1          | 18641     | PFKL      |
| 147 | 0.0364949               | 0.554215                     | -1.30401                    | TRUE   | FALSE  | FALSE  |             | 9         | 9qC            | 13143     | DAPK2     |
| 148 | 0.00485954              | 0.516318                     | -1.31344                    | TRUE   | FALSE  | FALSE  |             | 7         | 7qF3           | 11489     | ADAM12    |
| 149 | 0.0156305               | 0.538897                     | -1.31552                    | TRUE   | FALSE  | FALSE  |             | 10        | 10qD2          | 24117     | WIF1      |
| 150 | 0.0199814               | 0.538897                     | -1.31625                    | TRUE   | FALSE  | FALSE  |             | 6         | 6qF1           | 20315     | CXCL12    |
| 151 | 0.000654012             | 0.509961                     | -1.32645                    | TRUE   | FALSE  | FALSE  |             | 1         | 1qC5           | 227325    | DNER      |
| 152 | 0.0071673               | 0.526724                     | -1.34517                    | TRUE   | FALSE  | FALSE  |             | 6         | 6qB1           | 67861     | 2310005E1 |
| 153 | 0.0165897               | 0.538897                     | -1.36024                    | TRUE   | FALSE  | FALSE  |             | 16        | 16qC1.2        | 54613     | ST3GAL6   |
| 154 | 0.0119112               | 0.538897                     | -1.38341                    | TRUE   | FALSE  | FALSE  |             | 15        | 15qA1          | 223332    | RANBP3L   |
| 155 | 0.0469997               | 0.561001                     | -1.38892                    | TRUE   | FALSE  | FALSE  |             | 19        | 19qD2          | 14585     | GFRA1     |
| 156 | 0.0213751               | 0.538897                     | -1.41836                    | TRUE   | FALSE  | FALSE  |             | 6         | 6qB3           | 78004     | PRR15     |
| 157 | 0.00398404              | 0.516318                     | -1.49128                    | TRUE   | TRUE   | FALSE  |             | 11        | 11qB5          | 12569     | CDK5R1    |
| 158 | 0.0170959               | 0.538897                     | -1.50918                    | TRUE   | TRUE   | FALSE  |             | 18        | 18qB3          | 15183     | HDAC3     |
| 159 | 0.0456215               | 0.561001                     | -1.51065                    | TRUE   | FALSE  | FALSE  |             | 15        | 15qB2          | 69574     | CMBL      |
| 160 | 0.0156085               | 0.538897                     | -1.51391                    | TRUE   | TRUE   | FALSE  |             | 17        | 17qE3          | 74199     | VIT       |
| 161 | 0.00684109              | 0.526724                     | -1.52471                    | TRUE   | FALSE  | FALSE  |             | 4         | 4qE2           | 63954     | RBP7      |
| 162 | 0.0145837               | 0.538897                     | -1.52699                    | TRUE   | FALSE  | FALSE  | X           |           | XqA3.3         | 54405     | NDUFA1    |
| 163 | 0.00503672              | 0.516318                     | -1.55067                    | TRUE   | TRUE   | FALSE  |             | 3         | 3qA1           | 15213     | HEY1      |
| 164 | 0.00624599              | 0.516318                     | -1.55183                    | TRUE   | TRUE   | FALSE  |             | 8         | 8qB1.1         | 654824    | ANKRD37   |
| 165 | 0.00507868              | 0.516318                     | -1.59593                    | TRUE   | TRUE   | FALSE  |             | 8         | 8qB2           | 15446     | HPGD      |
| 166 | 0.019899                | 0.538897                     | -1.59624                    | TRUE   | TRUE   | FALSE  |             | 2         | 2qE2           | 333883    | CD59B     |

|     | J                       | K                            | L                           | M      | N      | O      | P           | Q         | R              | S         |
|-----|-------------------------|------------------------------|-----------------------------|--------|--------|--------|-------------|-----------|----------------|-----------|
| 1   | p-value(KO vs. WT)_exp2 | FDR(p-value(KO vs. WT))_exp2 | Fold-Change(KO vs. WT)_exp2 | FC>1SD | FC>2SD | FC>3SD | CHROMO SOME | CYTOBAN D | ENTREZ_GENE_ID | ILMN_GENE |
| 167 | 0.036772                | 0.554215                     | -1.59796                    | TRUE   | TRUE   | FALSE  | 11          | 11qE1     | 15896          | ICAM2     |
| 168 | 0.0447132               | 0.561001                     | -1.61913                    | TRUE   | TRUE   | FALSE  | 12          | 12qE      | 20715          | SERPINA3  |
| 169 | 0.0240235               | 0.550491                     | -1.72354                    | TRUE   | TRUE   | FALSE  | 15          | 15qD3     | 68453          | GPIHBP1   |
| 170 | 0.00404059              | 0.516318                     | -1.72433                    | TRUE   | TRUE   | FALSE  | 9           | 9qF4      | 215446         | ENTPD3    |
| 171 | 0.0257688               | 0.550491                     | -1.96729                    | TRUE   | TRUE   | FALSE  | 2           | 2qE2      | 12509          | CD59A     |
| 172 | 0.0373329               | 0.554215                     | -1.96849                    | TRUE   | FALSE  | FALSE  |             | 7qF5      | 20287          | SCT       |
| 173 | 0.0153481               | 0.538897                     | -2.1263                     | TRUE   | TRUE   | TRUE   | 5           | 5qE5      | 94111          | MEPE      |
| 174 | 0.018448                | 0.538897                     | -2.14004                    | TRUE   | TRUE   | TRUE   | 12          | 12qA2     | 58185          | RSAD2     |
| 175 | 0.0237919               | 0.550491                     | -2.17796                    | TRUE   | TRUE   | TRUE   | X           | XqF3      | 11656          | ALAS2     |
| 176 | 0.00497677              | 0.516318                     | -2.59441                    | TRUE   | TRUE   | TRUE   | 1           | 1qD       | 51801          | RAMP1     |
| 177 | 0.00278767              | 0.516318                     | -9.37215                    | TRUE   | TRUE   | TRUE   | 3           | 3qF1      | 20201          | S100A8    |

|    | T                 | U             | V | W | X | Y | Z | AA | AB | AC | AD |
|----|-------------------|---------------|---|---|---|---|---|----|----|----|----|
| 1  | <b>SEARCH KEY</b> | <b>SOURCE</b> |   |   |   |   |   |    |    |    |    |
| 2  | NM_007669.2       | RefSeq        |   |   |   |   |   |    |    |    |    |
| 3  | NM_010145.2       | RefSeq        |   |   |   |   |   |    |    |    |    |
| 4  | scl33993.13_72    | MEEBO         |   |   |   |   |   |    |    |    |    |
| 5  | NM_010493.2       | RefSeq        |   |   |   |   |   |    |    |    |    |
| 6  | scl51871.1.1_203  | MEEBO         |   |   |   |   |   |    |    |    |    |
| 7  | NM_013750.1       | RefSeq        |   |   |   |   |   |    |    |    |    |
| 8  | NM_008737.1       | RefSeq        |   |   |   |   |   |    |    |    |    |
| 9  | scl50457.4.570_36 | RefSeq        |   |   |   |   |   |    |    |    |    |
| 10 | NM_053110.2       | RefSeq        |   |   |   |   |   |    |    |    |    |
| 11 | scl33502.12_190   | RefSeq        |   |   |   |   |   |    |    |    |    |
| 12 | scl47198.5_117    | RefSeq        |   |   |   |   |   |    |    |    |    |
| 13 | NM_019521.1       | RefSeq        |   |   |   |   |   |    |    |    |    |
| 14 | scl17283.6_608    | RefSeq        |   |   |   |   |   |    |    |    |    |
| 15 | NM_028766.1       | RefSeq        |   |   |   |   |   |    |    |    |    |
| 16 | NM_013473.2       | RefSeq        |   |   |   |   |   |    |    |    |    |
| 17 | scl37927.8.1_330  | RefSeq        |   |   |   |   |   |    |    |    |    |
| 18 | scl021859.7_4     | RefSeq        |   |   |   |   |   |    |    |    |    |
| 19 | scl16393.3_24     | RefSeq        |   |   |   |   |   |    |    |    |    |
| 20 | NM_025807.1       | RefSeq        |   |   |   |   |   |    |    |    |    |
| 21 | NM_008184.1       | RefSeq        |   |   |   |   |   |    |    |    |    |
| 22 | NM_153416.1       | RefSeq        |   |   |   |   |   |    |    |    |    |
| 23 | scl35670.14_0     | RefSeq        |   |   |   |   |   |    |    |    |    |
| 24 | NM_001033476.1    | RefSeq        |   |   |   |   |   |    |    |    |    |
| 25 | scl30230.21.1_91  | RefSeq        |   |   |   |   |   |    |    |    |    |
| 26 | scl37484.18.1_30  | RefSeq        |   |   |   |   |   |    |    |    |    |
| 27 | scl20561.14_317   | MEEBO         |   |   |   |   |   |    |    |    |    |
| 28 | NM_054077.2       | RefSeq        |   |   |   |   |   |    |    |    |    |
| 29 | scl34770.25_118   | RefSeq        |   |   |   |   |   |    |    |    |    |
| 30 | scl46136.14_107   | RefSeq        |   |   |   |   |   |    |    |    |    |
| 31 | scl42068.4_0      | RefSeq        |   |   |   |   |   |    |    |    |    |
| 32 | NM_008256.2       | RefSeq        |   |   |   |   |   |    |    |    |    |
| 33 | NM_009128.1       | RefSeq        |   |   |   |   |   |    |    |    |    |
| 34 | scl43651.15_178   | RefSeq        |   |   |   |   |   |    |    |    |    |

|    | T                 | U             | V | W | X | Y | Z | AA | AB | AC | AD |
|----|-------------------|---------------|---|---|---|---|---|----|----|----|----|
| 1  | <b>SEARCH KEY</b> | <b>SOURCE</b> |   |   |   |   |   |    |    |    |    |
| 35 | scl39273.6_263    | RefSeq        |   |   |   |   |   |    |    |    |    |
| 36 | scl50042.7_106    | MEEBO         |   |   |   |   |   |    |    |    |    |
| 37 | NM_027519.1       | RefSeq        |   |   |   |   |   |    |    |    |    |
| 38 | NM_008780.1       | RefSeq        |   |   |   |   |   |    |    |    |    |
| 39 | scl020310.4_115   | MEEBO         |   |   |   |   |   |    |    |    |    |
| 40 | scl15480.1.1_277  | RefSeq        |   |   |   |   |   |    |    |    |    |
| 41 | NM_016687.1       | RefSeq        |   |   |   |   |   |    |    |    |    |
| 42 | NM_007907.1       | RefSeq        |   |   |   |   |   |    |    |    |    |
| 43 | NM_009721.2       | RefSeq        |   |   |   |   |   |    |    |    |    |
| 44 | scl43963.10.1_1   | RefSeq        |   |   |   |   |   |    |    |    |    |
| 45 | NM_011581.1       | RefSeq        |   |   |   |   |   |    |    |    |    |
| 46 | scl41667.16_331   | RefSeq        |   |   |   |   |   |    |    |    |    |
| 47 | scl016010.7_252   | RefSeq        |   |   |   |   |   |    |    |    |    |
| 48 | NM_021342.1       | RefSeq        |   |   |   |   |   |    |    |    |    |
| 49 | NM_015734.1       | RefSeq        |   |   |   |   |   |    |    |    |    |
| 50 | scl24434.7_205    | RefSeq        |   |   |   |   |   |    |    |    |    |
| 51 | scl0012443.2_180  | RefSeq        |   |   |   |   |   |    |    |    |    |
| 52 | NM_008057.2       | RefSeq        |   |   |   |   |   |    |    |    |    |
| 53 | NM_015732.3       | RefSeq        |   |   |   |   |   |    |    |    |    |
| 54 | scl51506.2_48     | RefSeq        |   |   |   |   |   |    |    |    |    |
| 55 | scl0002983.1_33   | RefSeq        |   |   |   |   |   |    |    |    |    |
| 56 | scl27971.8.1_8    | RefSeq        |   |   |   |   |   |    |    |    |    |
| 57 | scl21044.5.1_1    | RefSeq        |   |   |   |   |   |    |    |    |    |
| 58 | NM_007876.1       | RefSeq        |   |   |   |   |   |    |    |    |    |
| 59 | NM_009783.1       | RefSeq        |   |   |   |   |   |    |    |    |    |
| 60 | NM_028943.1       | RefSeq        |   |   |   |   |   |    |    |    |    |
| 61 | NM_023699.2       | RefSeq        |   |   |   |   |   |    |    |    |    |
| 62 | scl35378.12_17    | MEEBO         |   |   |   |   |   |    |    |    |    |
| 63 | NM_019390.1       | RefSeq        |   |   |   |   |   |    |    |    |    |
| 64 | NM_010786.2       | RefSeq        |   |   |   |   |   |    |    |    |    |
| 65 | NM_010743.1       | RefSeq        |   |   |   |   |   |    |    |    |    |
| 66 | scl46585.22_265   | RefSeq        |   |   |   |   |   |    |    |    |    |
| 67 | scl31836.4_387    | RefSeq        |   |   |   |   |   |    |    |    |    |

|     | T                   | U             | V | W | X | Y | Z | AA | AB | AC | AD |
|-----|---------------------|---------------|---|---|---|---|---|----|----|----|----|
| 1   | <b>SEARCH KEY</b>   | <b>SOURCE</b> |   |   |   |   |   |    |    |    |    |
| 68  | NM_009983.2         | RefSeq        |   |   |   |   |   |    |    |    |    |
| 69  | NM_176922.4         | RefSeq        |   |   |   |   |   |    |    |    |    |
| 70  | NM_010638.2         | RefSeq        |   |   |   |   |   |    |    |    |    |
| 71  | NM_021457.2         | RefSeq        |   |   |   |   |   |    |    |    |    |
| 72  | NM_009636.1         | RefSeq        |   |   |   |   |   |    |    |    |    |
| 73  | scl0013175.1_273    | RefSeq        |   |   |   |   |   |    |    |    |    |
| 74  | NM_145479.2         | RefSeq        |   |   |   |   |   |    |    |    |    |
| 75  | scl25354.23.1_78    | RefSeq        |   |   |   |   |   |    |    |    |    |
| 76  | scl26054.30_361     | RefSeq        |   |   |   |   |   |    |    |    |    |
| 77  | scl020338.1_17      | RefSeq        |   |   |   |   |   |    |    |    |    |
| 78  | scl18732.66_476     | RefSeq        |   |   |   |   |   |    |    |    |    |
| 79  | scl8260.1.1_298     | RefSeq        |   |   |   |   |   |    |    |    |    |
| 80  | scl52445.7_23       | RefSeq        |   |   |   |   |   |    |    |    |    |
| 81  | scl018412.1_16      | RefSeq        |   |   |   |   |   |    |    |    |    |
| 82  | scl26588.10.546_100 | RefSeq        |   |   |   |   |   |    |    |    |    |
| 83  | scl39780.1.1_180    | RefSeq        |   |   |   |   |   |    |    |    |    |
| 84  | scl00208213.1_60    | RefSeq        |   |   |   |   |   |    |    |    |    |
| 85  | NM_053168.1         | RefSeq        |   |   |   |   |   |    |    |    |    |
| 86  | NM_013509.2         | RefSeq        |   |   |   |   |   |    |    |    |    |
| 87  | scl51723.5_310      | RefSeq        |   |   |   |   |   |    |    |    |    |
| 88  | scl36787.11_464     | MEEBO         |   |   |   |   |   |    |    |    |    |
| 89  | NM_018861.2         | RefSeq        |   |   |   |   |   |    |    |    |    |
| 90  | scl17939.35.1_294   | RefSeq        |   |   |   |   |   |    |    |    |    |
| 91  | scl28767.1.1090_117 | RefSeq        |   |   |   |   |   |    |    |    |    |
| 92  | scl0098730.1_284    | RefSeq        |   |   |   |   |   |    |    |    |    |
| 93  | NM_207255.1         | RefSeq        |   |   |   |   |   |    |    |    |    |
| 94  | NM_145476.2         | RefSeq        |   |   |   |   |   |    |    |    |    |
| 95  | scl014104.1_1       | RefSeq        |   |   |   |   |   |    |    |    |    |
| 96  | NM_198037.1         | RefSeq        |   |   |   |   |   |    |    |    |    |
| 97  | scl40593.13.11_2    | RefSeq        |   |   |   |   |   |    |    |    |    |
| 98  | scl0074029.1_132    | RefSeq        |   |   |   |   |   |    |    |    |    |
| 99  | scl18373.4.1_231    | RefSeq        |   |   |   |   |   |    |    |    |    |
| 100 | NM_144892.1         | RefSeq        |   |   |   |   |   |    |    |    |    |

|     | T                 | U             | V | W | X | Y | Z | AA | AB | AC | AD |
|-----|-------------------|---------------|---|---|---|---|---|----|----|----|----|
| 1   | <b>SEARCH KEY</b> | <b>SOURCE</b> |   |   |   |   |   |    |    |    |    |
| 101 | NM_010549.1       | RefSeq        |   |   |   |   |   |    |    |    |    |
| 102 | scl21649.13_184   | RefSeq        |   |   |   |   |   |    |    |    |    |
| 103 | NM_134050.2       | RefSeq        |   |   |   |   |   |    |    |    |    |
| 104 | NM_008903.1       | RefSeq        |   |   |   |   |   |    |    |    |    |
| 105 | NM_028923.2       | RefSeq        |   |   |   |   |   |    |    |    |    |
| 106 | scl000125.1_16    | RefSeq        |   |   |   |   |   |    |    |    |    |
| 107 | scl00114565.1_269 | RefSeq        |   |   |   |   |   |    |    |    |    |
| 108 | scl25176.1.2_129  | RefSeq        |   |   |   |   |   |    |    |    |    |
| 109 | scl31411.7.1_30   | MEEBO         |   |   |   |   |   |    |    |    |    |
| 110 | NM_016796.2       | RefSeq        |   |   |   |   |   |    |    |    |    |
| 111 | NM_009293.1       | RefSeq        |   |   |   |   |   |    |    |    |    |
| 112 | NM_153581.2       | RefSeq        |   |   |   |   |   |    |    |    |    |
| 113 | NM_027445.1       | RefSeq        |   |   |   |   |   |    |    |    |    |
| 114 | scl23635.5.2_0    | RefSeq        |   |   |   |   |   |    |    |    |    |
| 115 | NM_001039502.1    | RefSeq        |   |   |   |   |   |    |    |    |    |
| 116 | scl0016071.1_62   | RefSeq        |   |   |   |   |   |    |    |    |    |
| 117 | NM_001034883.1    | RefSeq        |   |   |   |   |   |    |    |    |    |
| 118 | NM_022880.1       | RefSeq        |   |   |   |   |   |    |    |    |    |
| 119 | NM_021609.2       | RefSeq        |   |   |   |   |   |    |    |    |    |
| 120 | NM_001004174.1    | RefSeq        |   |   |   |   |   |    |    |    |    |
| 121 | NM_001008502.1    | RefSeq        |   |   |   |   |   |    |    |    |    |
| 122 | scl37132.7_178    | RefSeq        |   |   |   |   |   |    |    |    |    |
| 123 | NM_145586.1       | RefSeq        |   |   |   |   |   |    |    |    |    |
| 124 | NM_138681.2       | RefSeq        |   |   |   |   |   |    |    |    |    |
| 125 | scl34659.4.1_2    | RefSeq        |   |   |   |   |   |    |    |    |    |
| 126 | scl15731.3_14     | RefSeq        |   |   |   |   |   |    |    |    |    |
| 127 | NM_001033495.1    | RefSeq        |   |   |   |   |   |    |    |    |    |
| 128 | NM_010443.1       | RefSeq        |   |   |   |   |   |    |    |    |    |
| 129 | scl020341.12_22   | RefSeq        |   |   |   |   |   |    |    |    |    |
| 130 | scl47279.22_242   | RefSeq        |   |   |   |   |   |    |    |    |    |
| 131 | scl015039.10_13   | RefSeq        |   |   |   |   |   |    |    |    |    |
| 132 | scl978.1.1_59     | RefSeq        |   |   |   |   |   |    |    |    |    |
| 133 | scl37847.12_470   | MEEBO         |   |   |   |   |   |    |    |    |    |



|     | T                 | U             | V | W | X | Y | Z | AA | AB | AC | AD |
|-----|-------------------|---------------|---|---|---|---|---|----|----|----|----|
| 1   | <b>SEARCH KEY</b> | <b>SOURCE</b> |   |   |   |   |   |    |    |    |    |
| 134 | scl0003028.1_68   | RefSeq        |   |   |   |   |   |    |    |    |    |
| 135 | NM_009985.2       | RefSeq        |   |   |   |   |   |    |    |    |    |
| 136 | NM_013757.1       | RefSeq        |   |   |   |   |   |    |    |    |    |
| 137 | scl48967.5_235    | RefSeq        |   |   |   |   |   |    |    |    |    |
| 138 | scl017470.1_35    | RefSeq        |   |   |   |   |   |    |    |    |    |
| 139 | NM_145980.1       | RefSeq        |   |   |   |   |   |    |    |    |    |
| 140 | scl27062.3_485    | RefSeq        |   |   |   |   |   |    |    |    |    |
| 141 | NM_139228.2       | RefSeq        |   |   |   |   |   |    |    |    |    |
| 142 | scl21321.4_587    | RefSeq        |   |   |   |   |   |    |    |    |    |
| 143 | NM_016764.1       | RefSeq        |   |   |   |   |   |    |    |    |    |
| 144 | NM_020282.2       | RefSeq        |   |   |   |   |   |    |    |    |    |
| 145 | scl0020661.1_145  | RefSeq        |   |   |   |   |   |    |    |    |    |
| 146 | NM_008826.2       | RefSeq        |   |   |   |   |   |    |    |    |    |
| 147 | NM_010019.2       | RefSeq        |   |   |   |   |   |    |    |    |    |
| 148 | scl000247.1_3     | RefSeq        |   |   |   |   |   |    |    |    |    |
| 149 | NM_011915.1       | RefSeq        |   |   |   |   |   |    |    |    |    |
| 150 | scl0001241.1_2518 | RefSeq        |   |   |   |   |   |    |    |    |    |
| 151 | NM_152915.1       | RefSeq        |   |   |   |   |   |    |    |    |    |
| 152 | scl067861.1_19    | RefSeq        |   |   |   |   |   |    |    |    |    |
| 153 | scl48366.16_155   | RefSeq        |   |   |   |   |   |    |    |    |    |
| 154 | NM_198024.1       | RefSeq        |   |   |   |   |   |    |    |    |    |
| 155 | NM_010279.2       | RefSeq        |   |   |   |   |   |    |    |    |    |
| 156 | NM_030024.2       | RefSeq        |   |   |   |   |   |    |    |    |    |
| 157 | NM_009871.2       | RefSeq        |   |   |   |   |   |    |    |    |    |
| 158 | scl51496.12_24    | RefSeq        |   |   |   |   |   |    |    |    |    |
| 159 | NM_181588.2       | RefSeq        |   |   |   |   |   |    |    |    |    |
| 160 | scl50486.15.1_59  | RefSeq        |   |   |   |   |   |    |    |    |    |
| 161 | NM_022020.1       | RefSeq        |   |   |   |   |   |    |    |    |    |
| 162 | scl54331.2.4_4    | RefSeq        |   |   |   |   |   |    |    |    |    |
| 163 | scl22405.4_235    | RefSeq        |   |   |   |   |   |    |    |    |    |
| 164 | scl34861.7.1_55   | RefSeq        |   |   |   |   |   |    |    |    |    |
| 165 | scl33809.7_61     | RefSeq        |   |   |   |   |   |    |    |    |    |
| 166 | NM_181858.1       | RefSeq        |   |   |   |   |   |    |    |    |    |

|     | T                        | U      | V | W | X | Y | Z | AA | AB | AC | AD |
|-----|--------------------------|--------|---|---|---|---|---|----|----|----|----|
| 1   | <b>SEARCH KEY SOURCE</b> |        |   |   |   |   |   |    |    |    |    |
| 167 | NM_010494.1              | RefSeq |   |   |   |   |   |    |    |    |    |
| 168 | scl020715.6_281          | RefSeq |   |   |   |   |   |    |    |    |    |
| 169 | scl068453.4_14           | RefSeq |   |   |   |   |   |    |    |    |    |
| 170 | NM_178676.2              | RefSeq |   |   |   |   |   |    |    |    |    |
| 171 | NM_007652.2              | RefSeq |   |   |   |   |   |    |    |    |    |
| 172 | NM_011328.1              | RefSeq |   |   |   |   |   |    |    |    |    |
| 173 | NM_053172.1              | RefSeq |   |   |   |   |   |    |    |    |    |
| 174 | NM_021384.2              | RefSeq |   |   |   |   |   |    |    |    |    |
| 175 | scl54562.12.1_64         | RefSeq |   |   |   |   |   |    |    |    |    |
| 176 | scl17654.5.1_10          | RefSeq |   |   |   |   |   |    |    |    |    |
| 177 | scl22940.2.1_25          | RefSeq |   |   |   |   |   |    |    |    |    |
